# Supplementary material for: Binding free energy of protein/ligand complexes calculated using dissociation Parallel Cascade Selection Molecular Dynamics and Markov state model
Source: PubMed Central journal article supplement — Biophys Physicobiol. 2021 Dec 4;18:305–16. doi: 10.2142/biophysico.bppb-v18.037 (PMC8694779; doi:10.2142/biophysico.bppb-v18.037), 2021-12-04

**Supplementary Figure S1.**

Implied timescale versus lag time relation for the three slowest motions obtained for a representative 1D-MSM for each complex. a) Trypsin/benzamidine, b) FKBP/FK506, and c) Adenosine A2a receptor/T4E.

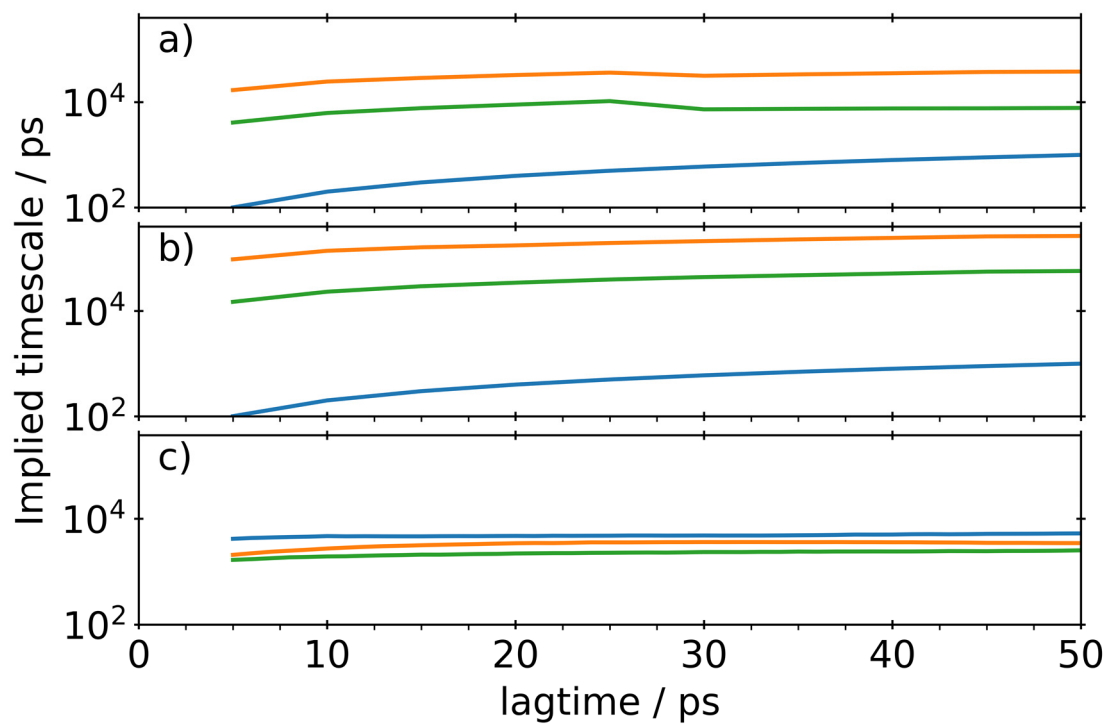

Supplement: 18_bppb-v18.037_s01.pdf [file 18_bppb-v18.037_s01.pdf]
